# Supplementary material for: FAM71F1 binds to RAB2A and RAB2B and is essential for acrosome formation and male fertility in mice
Source: PubMed Central journal article supplement (PMC8602946; doi:10.1242/dev.199644), 2021-10-29
Supplement: develop-148-199644-s1.pdf [file develop-148-199644-s1.pdf]

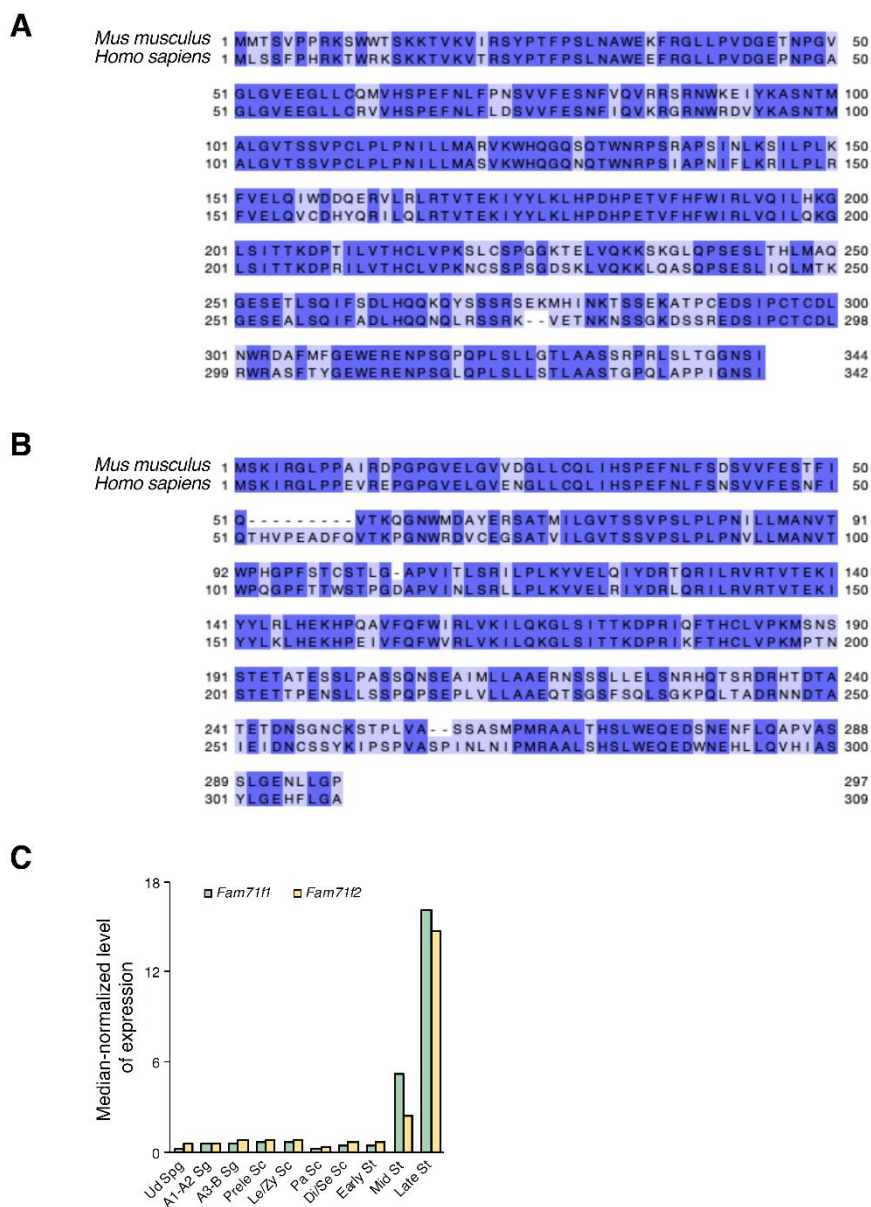

**Fig. S1. Similarity of amino acid sequences and expression patterns of *Fam71f1* and *Fam71f2*.**

(A) Amino acid sequence of FAM71F1 in *Mus musculus* and *Homo sapiens*. Dark purple indicates matching sequences in both species. (B) Amino acid sequence of FAM71F2 in *Mus musculus* and *Homo sapiens*. Dark purple indicates matching sequences in both species. (C) *Fam71f1* and *Fam71f2* expression during spermatogenesis in mice. Ud Spg, undifferentiated spermatogonia; A1-A2 Sg, A1-A2 differentiating spermatogonia; A3-B Sg, A3- A4-In-B differentiating spermatogonia; Prele Sc, preleptotene spermatocytes; Le/Zy Sc, leptotene/zygotene spermatocytes; Pa Sc, pachytene spermatocytes; Di/Se Sc, diplotene/secondary spermatocytes; Early St, early round spermatids; Mid St, mid round spermatids; Late St, late round spermatids.

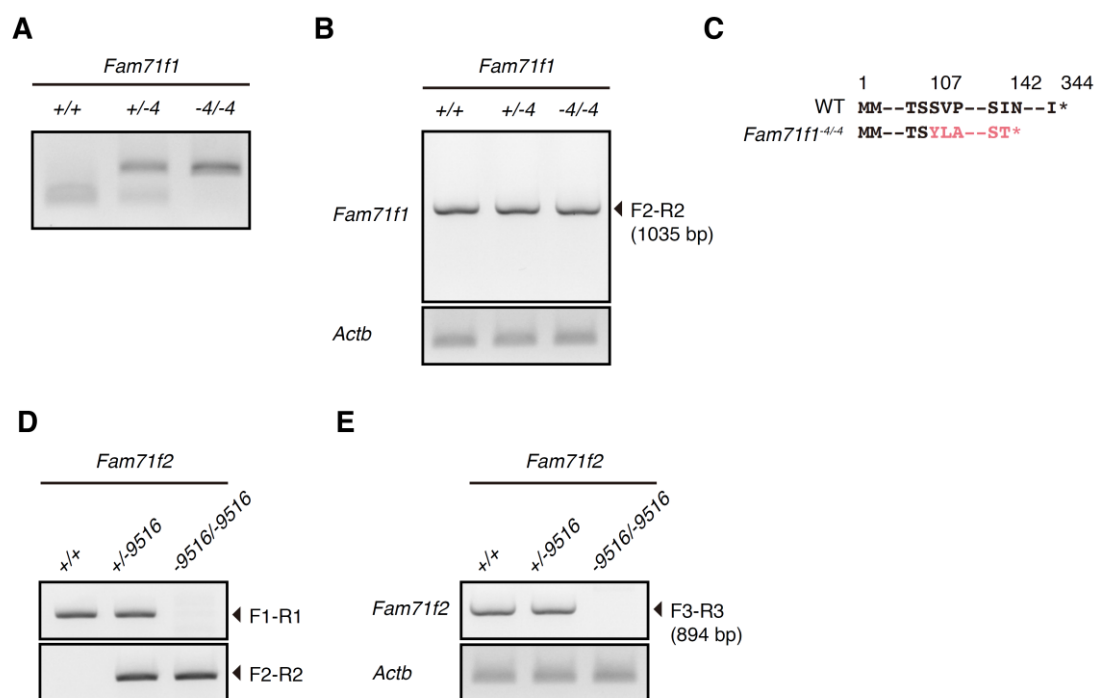

### Fig. S2. Generation of *Fam71f1* or *Fam71f2* knockout mice.

(A) Genotyping of *Fam71f1* mutant mice. F1 and R1 primers in Fig. 1C were used and the PCR product was digested with *RsaI*. The PCR product of the wild-type allele was cut into 155 bp and 183 bp products after *RsaI* treatment. (B) RT-PCR analysis for *Fam71f1* expression in testes. F2 and R2 primers in Fig. 1C were used. *Actb* was used as a loading control. (C) Amino acid sequences encoded by *Fam71f1*<sup>+/+</sup> and *Fam71f1*<sup>-4/-4</sup> alleles. The 4 bp deletion in the second exon of *Fam71f1* causes a S107Y mutation and a premature stop codon. (D) Genotyping of *Fam71f2* mutant mice. F1-R1 and F2-R2 primers in Fig. 1E were used. F2 and R2 can amplify the KO allele because of the large deletion. (E) RT-PCR analysis for *Fam71f2* expression in testes. F3 and R3 primers in Fig. 1E were used. *Actb* was used as a loading control.

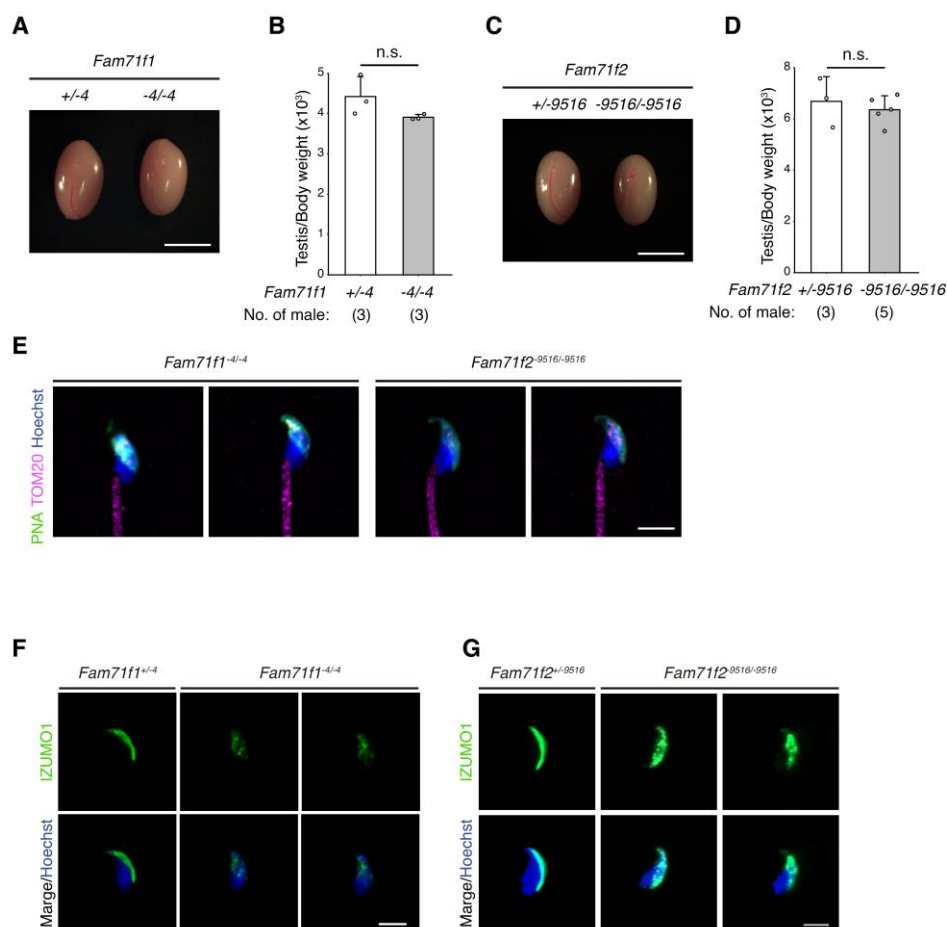

**Fig. S3. Testis gross morphology and sperm head morphology in *Fam71f1* and *Fam71f2* mutant mice.**

(A) Testis morphology of *Fam71f1*<sup>+/-4</sup> and *Fam71f1*<sup>-4/-4</sup> mice. Scale bar, 5 mm. (B) Testis/body weight of *Fam71f1*<sup>+/-4</sup> and *Fam71f1*<sup>-4/-4</sup> mice. Error bars represent S.D. n.s.; not-significant (unpaired Student's t-test). Number of males = 3 each. (C) Testis morphology of *Fam71f2*<sup>+/-9516</sup> and *Fam71f2*<sup>-9516/-9516</sup> mice. Scale bar, 5 mm. (D) Testis/body weight of *Fam71f2*<sup>+/-9516</sup> and *Fam71f2*<sup>-9516/-9516</sup> mice. Error bars represent S.D. n.s.; not-significant (unpaired Student's t-test). Number of males = 3 for *Fam71f2*<sup>+/-9516</sup> and 5 for *Fam71f2*<sup>-9516/-9516</sup>. (E) Immunofluorescence staining of the acrosome and mitochondria. More examples of abnormal acrosome morphology (Fig. 2D) are shown. Hoechst (blue), nucleus; lectin-PNA (green), acrosome; TOM20 (magenta), mitochondria. Scale bar, 5  $\mu$ m. (F) Immunofluorescence staining for IZUMO1 using fixed *Fam71f1* mutant spermatozoa. IZUMO1 was abnormally spread over the head in *Fam71f1* mutant spermatozoa. Hoechst (blue), nucleus; IZUMO1 (green). Scale bar, 5  $\mu$ m. (G) Immunofluorescence staining for IZUMO1 using fixed *Fam71f2* mutant spermatozoa. IZUMO1 signal was slightly expanded in *Fam71f2* mutant spermatozoa. Hoechst (blue), nucleus; IZUMO1 (green). Scale bar, 5  $\mu$ m.

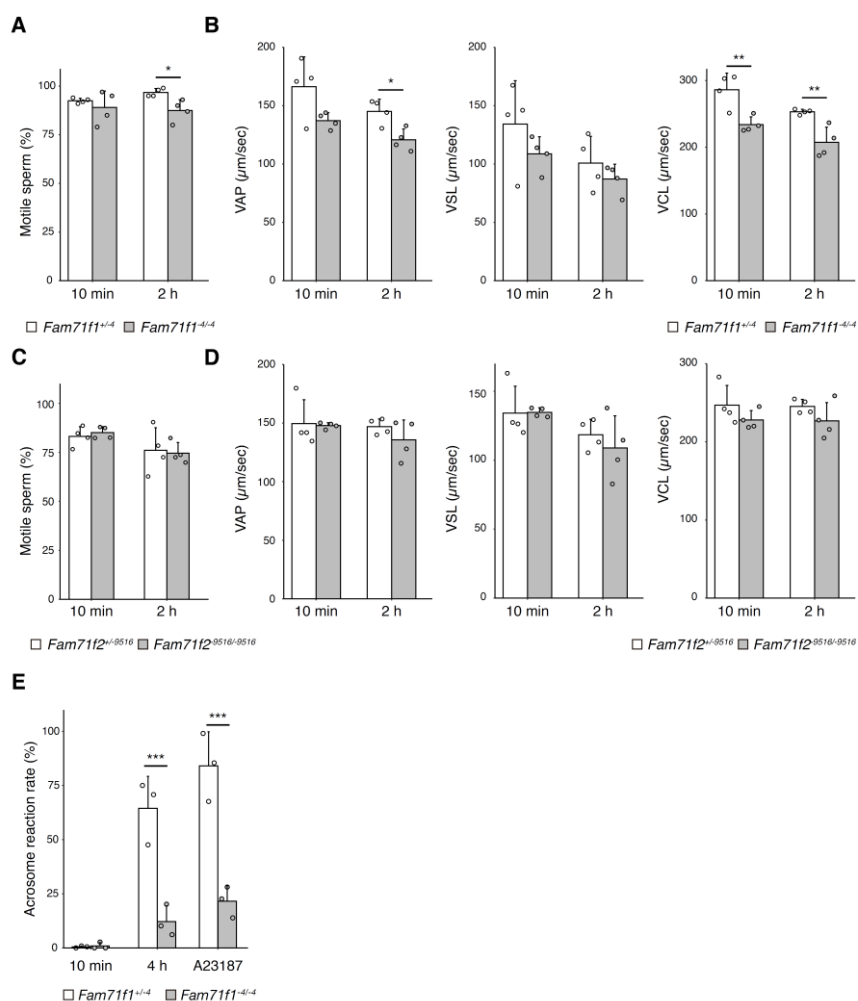

**Fig. S4. Analyses of sperm motility and acrosome reaction.**

(A) Percentage of motile spermatozoa in *Fam71f1* mutant males. Error bars represent S.D. \* $p < 0.05$  (unpaired Student's t-test). Number of males = 4 each. (B) Velocity analysis of motile spermatozoa in *Fam71f1* mutant males. VAP (average path velocity), VSL (straight line velocity), and VCL (curvilinear velocity) were analyzed. \* $p < 0.05$ , \*\* $p < 0.01$  (unpaired Student's t-test). Error bars represent S.D. Number of males = 4 each. (C) Percentage of motile spermatozoa in *Fam71f2* mutant males. No significant difference was found. Error bars represent S.D. Number of males = 4 each. (D) Velocity analysis of motile spermatozoa in *Fam71f2* mutant males. No significant differences were found. Error bars represent S.D. Number of males = 4 each. (E) The acrosome reaction rates at 10 minutes and 4 hours after incubation in capacitation medium. After 4 hours incubation,  $Ca^{2+}$  ionophore A23187 was added to induce the acrosome reaction. The acrosome reaction was analyzed using *Acr-EGFP* transgenic mice. After 4 hours of incubation and A23187 addition, the acrosome reaction rates were significantly lower in *Fam71f1*<sup>-4/-4</sup> mice compared to those of *Fam71f1*<sup>+/-4</sup> mice. Error bars represent S.D. \*\*\* $p < 0.001$  (unpaired Student's t-test). Number of males = 3 each.

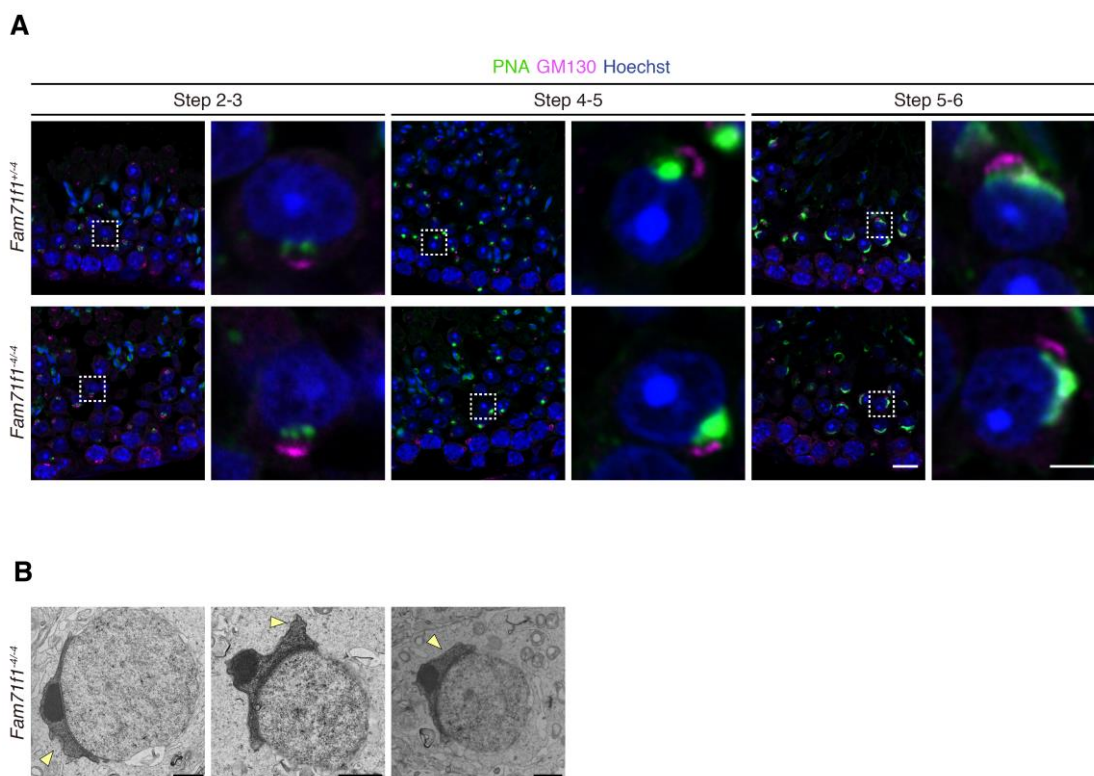

**Fig. S5. Observation of the acrosome formation in *Fam71f1*<sup>-/-</sup> mice.**

(A) Immunofluorescence staining of the acrosome and Golgi apparatus during spermatogenesis using testis sections. In round spermatids around step 2-6, the morphology of the acrosome was comparable to that of the control. Hoechst (blue), nucleus; lectin-PNA (green), acrosome; GM130 (magenta), Golgi apparatus. Scale bar in low magnification, 10  $\mu$ m; high magnification, 5  $\mu$ m.

(B) TEM observation of the acrosome formation. More examples of abnormal acrosome swelling (arrowheads) around step 4-5 in *Fam71f1*<sup>-/-</sup> mice (Fig. 4B) are shown. Scale bar, 1  $\mu$ m.

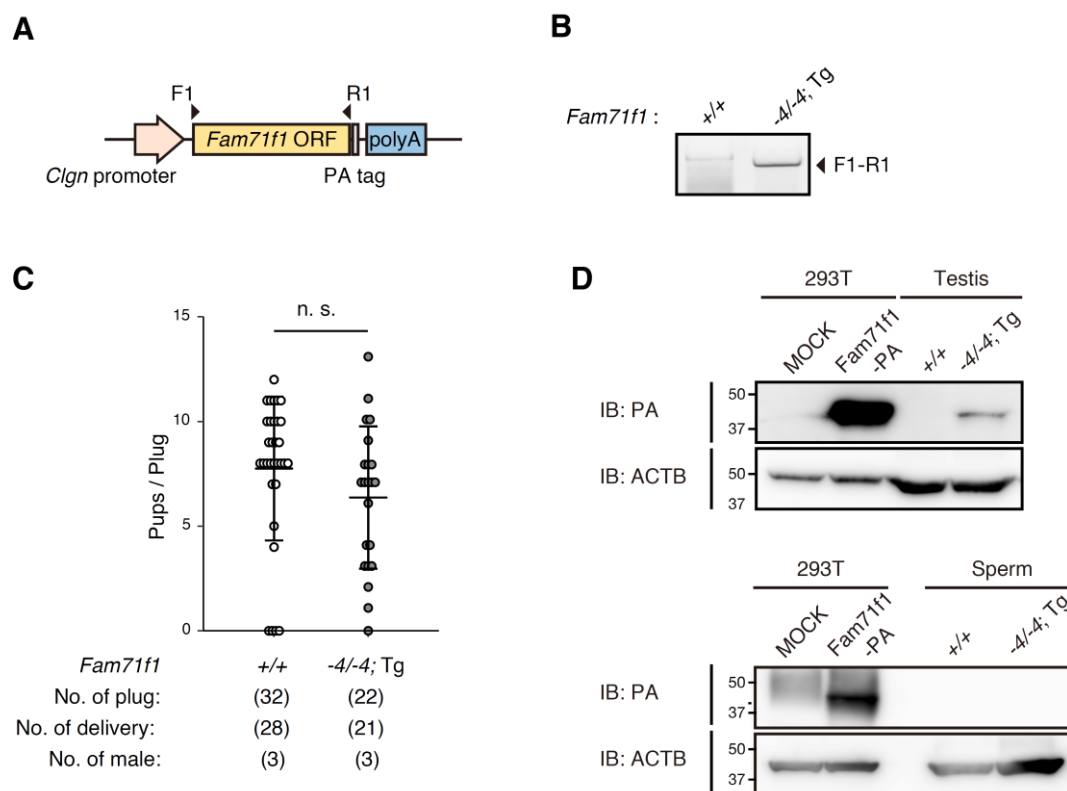

### Fig. S6. Generation of *Fam71f1*-PA Tg mice.

(A) Schematic of the transgene. *Fam71f1*-PA is expressed under the *Clgn* promoter. Primers F1 and R1 are used for genotyping. (B) Genotyping of *Fam71f1*-PA Tg mice. F1 and R1 primers in Fig. S6A were used. (C) Fertility of *Fam71f1*-PA Tg mice. Males of *Fam71f1*<sup>+/+</sup> or *Fam71f1*<sup>-/-</sup> with the transgene were mated with wild-type females and the number of pups born per plug was counted. Error bars represent S.D. n.s.; not-significant (unpaired Student's t-test). Number of males = 3 each. (D) Immunoblotting analysis for FAM71F1-PA using HEK293T cells, testes, and cauda epididymal spermatozoa. *Fam71f1*-PA was transiently transfected in HEK293T cells for positive controls. ACTB was used as a loading control.

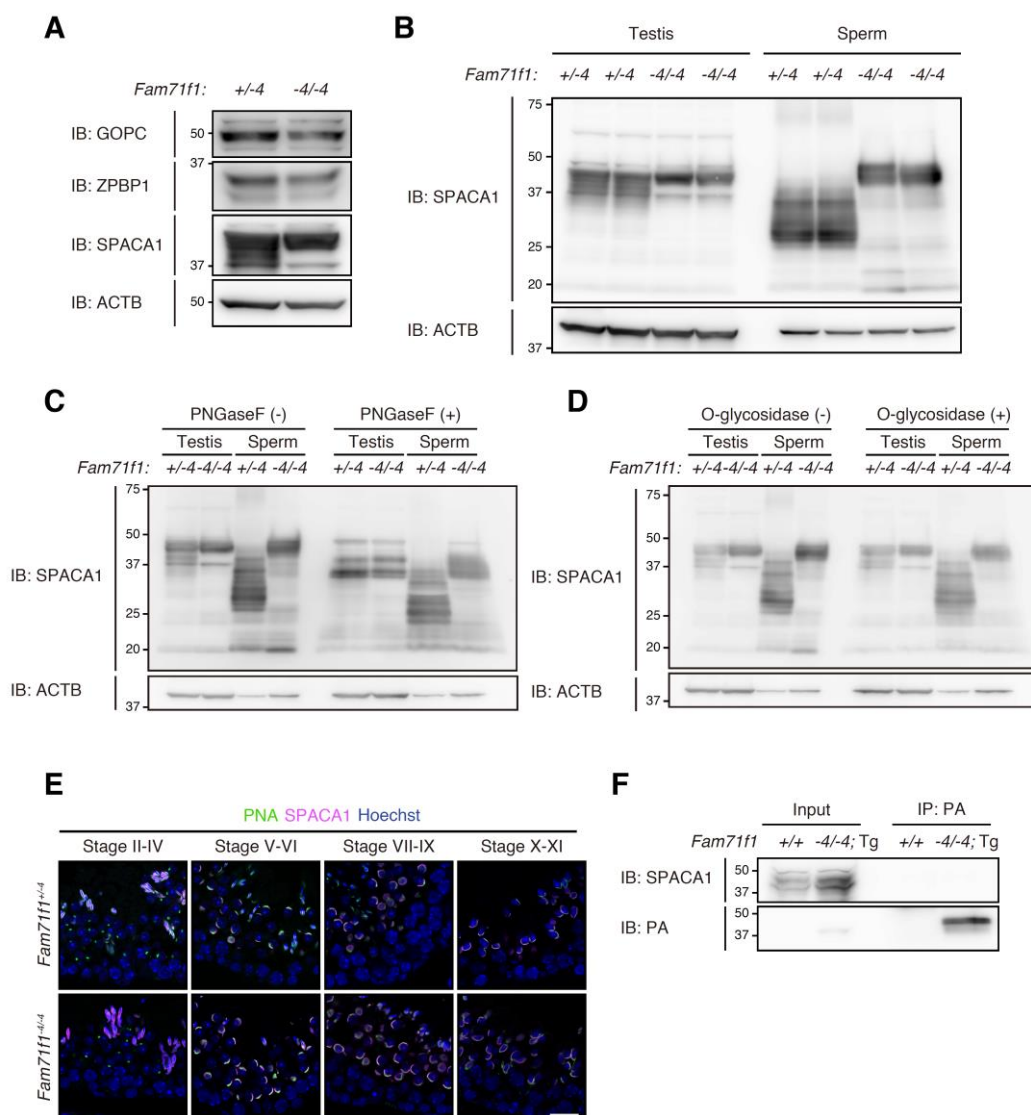

**Fig. S7. Relationship between FAM71F1 and other globozoospermia-related proteins.**

(A) Immunoblotting analysis of the proteins known to contribute to acrosome formation. Testis lysates from *Fam71f1*<sup>+/-</sup> or *Fam71f1*<sup>-/-</sup> males were used to detect GOPC, ZPBP1, and SPACA1. ACTB was used as a loading control. (B) Immunoblotting analysis of SPACA1 in testes and cauda epididymal spermatozoa. ACTB was used as a loading control. (C) Immunoblotting analysis of SPACA1 in testes and cauda epididymal spermatozoa. Samples were treated with PNGase F. ACTB was used as a loading control. (D) Immunoblotting analysis of SPACA1 in testes and cauda epididymal spermatozoa. Samples were treated with O-glycosidase. ACTB was used as a loading control. (E) Immunofluorescence staining for the acrosome and SPACA1 during spermatogenesis using testis sections. Hoechst (blue), nucleus; lectin-PNA (green), acrosome; SPACA1 (magenta). Scale bar, 20  $\mu$ m. (F) Immunoprecipitation of FAM71F1-PA using anti-PA antibody in *Fam71f1*-PA Tg testis. SPACA1 was not detected by immunoblotting analysis.

**A**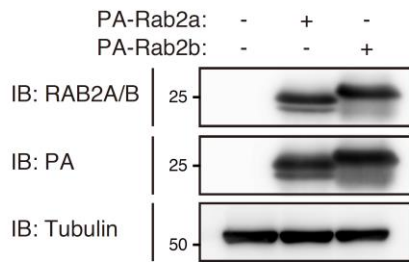**B**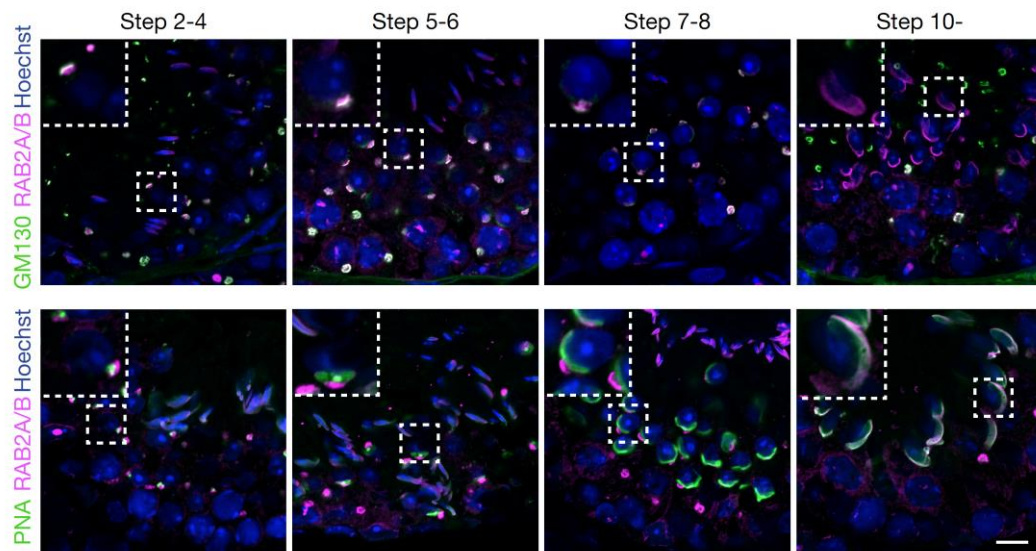**Fig. S8. Localization of RAB2A/B in the testis.**

(A) Confirmation of RAB2A/B antibody. *PA-Rab2a* or *PA-Rab2b* was transiently transfected in HEK293T cells. The RAB2A/B antibody reacts with both PA-RAB2A and PA-RAB2B. Tubulin was used as a loading control. (B) Immunofluorescence staining of RAB2A/B during spermatogenesis using testis sections. RAB2A/B was localized in the Golgi apparatus until step 7-8. Enlarged pictures are shown in the top-left corner. Hoechst (blue), nucleus; GM130 (green) (upper panels), Golgi apparatus; PNA (green) (lower panels), acrosome; RAB2A/B (magenta). Scale bar, 10  $\mu$ m.

**Table S1. Identified proteins by immunoprecipitation - mass spectrometry.**

[Click here to download Table S1](#)



**Table S2. Sequences of primers.**

| Method            | Target                 | Strand         | Sequence (5'→3')                     | Name in Fig.                   |  |
|-------------------|------------------------|----------------|--------------------------------------|--------------------------------|--|
| RT-PCR            | <i>Fam71f1</i>         | F              | ATGATGACATCAGTTCCACCTAGAAAAGTC       | F2                             |  |
|                   |                        | R              | TATAGAGTTTCCTCCAGTTAGGGACAGCC        | R2                             |  |
|                   | <i>Fam71f2</i>         | F              | ATGAGTAAAATTAGGGGCCTCCCTCC           | F3                             |  |
|                   |                        | R              | GGGTCCAACAAGTTCTCTCC                 | R3                             |  |
|                   | <i>Actb</i>            | F              | CATCCGTAAAGACCTCTATGCCAAC            |                                |  |
|                   |                        | R              | ATGGAGCCACCGATCCACA                  |                                |  |
| Genotyping        | <i>Fam71f1</i>         | F              | AGTGCTGAGTGAAGAAACCC                 | F1                             |  |
|                   |                        | R              | ATTTAACAGGTAGCCTCCCC                 | R1                             |  |
|                   | <i>Fam71f1</i> - PA tg | F              | ATGATGACATCAGTTCCACCTAGAAAAGTC       | F1                             |  |
|                   |                        | R              | TATAGAGTTTCCTCCAGTTAGGGACAGCC        | R1                             |  |
|                   | <i>Fam71f2</i>         | F              | CAGCAATGGTGATTGATGGG                 | F1                             |  |
|                   |                        | R              | ATCCCACTGTATTGTTTCAGG                | R1                             |  |
|                   |                        | F              | GTCTTAAACTCCTATCAGG                  | F2                             |  |
|                   |                        | R              | CTGTGTAGCTCCTGTTTGG                  | R2                             |  |
|                   | Cloning                | <i>Fam71f1</i> | F                                    | ATGATGACATCAGTTCCACCTAGAAAAGTC |  |
|                   |                        |                | R                                    | TATAGAGTTTCCTCCAGTTAGGGACAGCC  |  |
| <i>Fam71f2</i>    |                        | F              | ATGAGTAAAATTAGGGGCCTCCCTCC           |                                |  |
|                   |                        | R              | GGGTCCAACAAGTTCTCTCC                 |                                |  |
| <i>Rab2a</i>      |                        | F              | ATGGCGTACGCCTATCTCTCAAGTAC           |                                |  |
|                   |                        | R              | TCAACAGCAGCCTCCCCCTGC                |                                |  |
| <i>Rab2a</i> (CA) |                        | F              | TTGGAGTCCTTTCGTTCTATCACACG           |                                |  |
|                   |                        | R              | CCCTGCTGTATCCCAGATCTGG               |                                |  |
| <i>Rab2a</i> (CN) |                        | F              | AACTGCTTATTGCTACAGTTTACAG            |                                |  |
|                   |                        | R              | TTTACCAACACCTGTGTCGC                 |                                |  |
| <i>Rab2b</i>      |                        | F              | ATGACTTACGCTTATCTCTTCAAGTACATCATCATC |                                |  |
|                   |                        | R              | GCAGCAGCCAGAGTCAGGCC                 |                                |  |

**Table S3. Sequences of gRNA.**

| Target                                                | Name in Fig. 1 | Sequence (5'→3')     |
|-------------------------------------------------------|----------------|----------------------|
| <i>Fam71f1</i><br>(Exon 2)                            | gRNA           | CCTCCGTACCTGCCTTCCC  |
| <i>Fam71f2</i><br>(5' UTR)                            | gRNA_1         | GCCCAACTCCAAGGTGTCGG |
| <i>Fam71f2</i><br>(3' UTR -<br>down stream<br>region) | gRNA_2         | AATGGAGTCCTCGTTGTTGG |

**Table S4. Antibodies used in this study.**

| Immunoprecipitation                                      |                                                                |                |                                                                           |
|----------------------------------------------------------|----------------------------------------------------------------|----------------|---------------------------------------------------------------------------|
| Antigen                                                  | Provider                                                       | Catalog number | Volume                                                                    |
| PA tag                                                   | FUJIFILM Wako Pure Chemical                                    | 016-25861      | 1 $\mu$ L for Immunoblot sample<br>2 $\mu$ L for Mass spectrometry sample |
| FLAG tag (M2)                                            | Sigma-Aldrich                                                  | F1804          | 0.6 $\mu$ L                                                               |
| Immunoblotting                                           |                                                                |                |                                                                           |
| Antigen                                                  | Provider or Reference                                          | Catalog number | Dilution                                                                  |
| PA tag                                                   | FUJIFILM Wako Pure Chemical                                    | 016-25861      | 1:1000                                                                    |
| FLAG tag                                                 | MBL                                                            | PM020          | 1:1000                                                                    |
| $\alpha$ -Tubulin (B-5-1-2)                              | Sigma-Aldrich                                                  | T5168          | 1:2000                                                                    |
| $\beta$ -Actin (AC-15)                                   | abcam                                                          | ab6276         | 1:5000                                                                    |
| GOPC                                                     | abcam                                                          | ab37036        | 1:1000                                                                    |
| ZBPB1                                                    | Lin YN <i>et al.</i> , Mol Cell Biol.,<br>27:6794-805., (2007) |                | 1:1000                                                                    |
| SPACA1                                                   | Fujihara Y <i>et al.</i> , Development,<br>139:3583-9., (2012) |                | 1:1000                                                                    |
| RAB2                                                     | Thermo fisher scientific                                       | PA5-21962      | 1:500                                                                     |
| Rabbit IgG (HRP conjugated)                              | Jackson ImmunoResearch                                         | 111-036-045    | 1:5000                                                                    |
| Mouse IgG (HRP conjugated)                               | Jackson ImmunoResearch                                         | 115-036-062    | 1:5000                                                                    |
| Rat IgG (HRP conjugated)                                 | Jackson ImmunoResearch                                         | 112-035-167    | 1:5000                                                                    |
| Goat IgG (HRP conjugated)                                | Jackson ImmunoResearch                                         | 805-035-180    | 1:500                                                                     |
| Immunocytochemistry (ICC) and Immunohistochemistry (IHC) |                                                                |                |                                                                           |
| Antigen                                                  | Provider or Reference                                          | Catalog number | Dilution                                                                  |
| HA tag                                                   | MBL                                                            | 561            | 1:1000                                                                    |
| TOM20 (FL-145)                                           | Santa Cruz Biotechnology                                       | sc-11415       | 1:100                                                                     |
| IZUMO1 (KS64-125)                                        | Ikawa M <i>et al.</i> , J Biol Chem.,<br>286:5639-46., (2011)  |                | 1:500 (Fig. 4C)<br>1:100 (Fig. 4D)                                        |
| GM130                                                    | BD Biosciences                                                 | 610822         | 1:1000                                                                    |
| SPACA1                                                   | Fujihara Y <i>et al.</i> , Development,<br>139:3583-9., (2012) |                | 1:1000                                                                    |
| RAB2                                                     | Thermo fisher scientific                                       | PA5-21962      | 1:100                                                                     |
| Rabbit IgG (Alexa Fluor 546 conjugated)                  | Thermo fisher scientific                                       | A-11071        | 1:1000 (for ICC)<br>1:200 (for IHC)                                       |
| Mouse IgG (Alexa Fluor 488 conjugated)                   | Thermo fisher scientific                                       | A-11017        | 1:1000 (for ICC)<br>1:200 (for IHC)                                       |
| Mouse IgG (Alexa Fluor 546 conjugated)                   | Thermo fisher scientific                                       | A-11018        | 1:200                                                                     |
| Rat IgG (Alexa Fluor 488 conjugated)                     | Thermo fisher scientific                                       | A-11006        | 1:200                                                                     |
